# Supplementary material for: High Prevalence of Non-Vaccinated Oncogenic Human Papillomavirus Genotypes in High-Grade Squamous Intraepithelial Lesions of the Cervix: Thought-Provoking Results of a Detailed HPV Genotype Analysis
Source: MDPI journal article supplement (doi:10.3390/vaccines10050748), 2022-05-10
Supplement: s1 [file s1]

**Supplementary Table S1.**

Distribution of HPV genotypes in each sample. C: cytology, (means PAP smear); H: histology, (means FFPE sample) of the same patient. High-risk genotypes are highlighted in red colour, low-risk genotypes are in green colour. The „o” sign indicates the cytology for easy distinction.

|       |    | HPV GENOTYPES |    |    |    |    |    |    |    |    |    |    |    |       |    |    |    |    |    |    |    |    |    |       |    |    |    |    |    |    |    |    |    |    |  |  |  |
|-------|----|---------------|----|----|----|----|----|----|----|----|----|----|----|-------|----|----|----|----|----|----|----|----|----|-------|----|----|----|----|----|----|----|----|----|----|--|--|--|
|       |    | 6             | 11 | 16 | 18 | 26 | 31 | 33 | 35 | 39 | 40 | 42 | 43 | 44/55 | 45 | 51 | 52 | 53 | 54 | 56 | 58 | 59 | 61 | 62/81 | 66 | 67 | 68 | 69 | 70 | 71 | 72 | 73 | 82 | 84 |  |  |  |
| CASES | 1  | C             |    |    |    |    |    |    |    |    |    |    |    |       |    |    |    |    |    |    |    |    |    |       |    |    |    |    |    |    |    |    |    |    |  |  |  |
|       |    | H             |    |    |    |    |    |    |    |    |    |    |    |       |    |    |    |    |    |    |    |    |    |       |    |    |    |    |    |    |    |    |    |    |  |  |  |
|       | 2  | C             |    |    |    |    |    |    |    |    |    |    |    |       |    |    |    |    |    |    |    |    |    |       |    |    |    |    |    |    |    |    |    |    |  |  |  |
|       |    | H             |    |    |    |    |    |    |    |    |    |    |    |       |    |    |    |    |    |    |    |    |    |       |    |    |    |    |    |    |    |    |    |    |  |  |  |
|       | 3  | C             |    |    |    |    |    |    |    |    |    |    |    |       |    |    |    |    |    |    |    |    |    |       |    |    |    |    |    |    |    |    |    |    |  |  |  |
|       |    | H             |    |    |    |    |    |    |    |    |    |    |    |       |    |    |    |    |    |    |    |    |    |       |    |    |    |    |    |    |    |    |    |    |  |  |  |
|       | 4  | C             |    |    |    |    |    |    |    |    |    |    |    |       |    |    |    |    |    |    |    |    |    |       |    |    |    |    |    |    |    |    |    |    |  |  |  |
|       |    | H             |    |    |    |    |    |    |    |    |    |    |    |       |    |    |    |    |    |    |    |    |    |       |    |    |    |    |    |    |    |    |    |    |  |  |  |
|       | 5  | C             |    |    |    |    |    |    |    |    |    |    |    |       |    |    |    |    |    |    |    |    |    |       |    |    |    |    |    |    |    |    |    |    |  |  |  |
|       |    | H             |    |    |    |    |    |    |    |    |    |    |    |       |    |    |    |    |    |    |    |    |    |       |    |    |    |    |    |    |    |    |    |    |  |  |  |
|       | 6  | C             |    |    |    |    |    |    |    |    |    |    |    |       |    |    |    |    |    |    |    |    |    |       |    |    |    |    |    |    |    |    |    |    |  |  |  |
|       |    | H             |    |    |    |    |    |    |    |    |    |    |    |       |    |    |    |    |    |    |    |    |    |       |    |    |    |    |    |    |    |    |    |    |  |  |  |
|       | 7  | C             |    |    |    |    |    |    |    |    |    |    |    |       |    |    |    |    |    |    |    |    |    |       |    |    |    |    |    |    |    |    |    |    |  |  |  |
|       |    | H             |    |    |    |    |    |    |    |    |    |    |    |       |    |    |    |    |    |    |    |    |    |       |    |    |    |    |    |    |    |    |    |    |  |  |  |
|       | 8  | C             |    |    |    |    |    |    |    |    |    |    |    |       |    |    |    |    |    |    |    |    |    |       |    |    |    |    |    |    |    |    |    |    |  |  |  |
|       |    | H             |    |    |    |    |    |    |    |    |    |    |    |       |    |    |    |    |    |    |    |    |    |       |    |    |    |    |    |    |    |    |    |    |  |  |  |
|       | 9  | C             |    |    |    |    |    |    |    |    |    |    |    |       |    |    |    |    |    |    |    |    |    |       |    |    |    |    |    |    |    |    |    |    |  |  |  |
|       |    | H             |    |    |    |    |    |    |    |    |    |    |    |       |    |    |    |    |    |    |    |    |    |       |    |    |    |    |    |    |    |    |    |    |  |  |  |
|       | 10 | C             |    |    |    |    |    |    |    |    |    |    |    |       |    |    |    |    |    |    |    |    |    |       |    |    |    |    |    |    |    |    |    |    |  |  |  |
|       |    | H             |    |    |    |    |    |    |    |    |    |    |    |       |    |    |    |    |    |    |    |    |    |       |    |    |    |    |    |    |    |    |    |    |  |  |  |
|       | 11 | C             |    |    |    |    |    |    |    |    |    |    |    |       |    |    |    |    |    |    |    |    |    |       |    |    |    |    |    |    |    |    |    |    |  |  |  |
|       |    | H             |    |    |    |    |    |    |    |    |    |    |    |       |    |    |    |    |    |    |    |    |    |       |    |    |    |    |    |    |    |    |    |    |  |  |  |
|       | 12 | C             |    |    |    |    |    |    |    |    |    |    |    |       |    |    |    |    |    |    |    |    |    |       |    |    |    |    |    |    |    |    |    |    |  |  |  |
|       |    | H             |    |    |    |    |    |    |    |    |    |    |    |       |    |    |    |    |    |    |    |    |    |       |    |    |    |    |    |    |    |    |    |    |  |  |  |
|       | 13 | C             |    |    |    |    |    |    |    |    |    |    |    |       |    |    |    |    |    |    |    |    |    |       |    |    |    |    |    |    |    |    |    |    |  |  |  |
|       |    | H             |    |    |    |    |    |    |    |    |    |    |    |       |    |    |    |    |    |    |    |    |    |       |    |    |    |    |    |    |    |    |    |    |  |  |  |
|       | 14 | C             |    |    |    |    |    |    |    |    |    |    |    |       |    |    |    |    |    |    |    |    |    |       |    |    |    |    |    |    |    |    |    |    |  |  |  |
|       |    | H             |    |    |    |    |    |    |    |    |    |    |    |       |    |    |    |    |    |    |    |    |    |       |    |    |    |    |    |    |    |    |    |    |  |  |  |
|       | 15 | C             |    |    |    |    |    |    |    |    |    |    |    |       |    |    |    |    |    |    |    |    |    |       |    |    |    |    |    |    |    |    |    |    |  |  |  |
|       |    | H             |    |    |    |    |    |    |    |    |    |    |    |       |    |    |    |    |    |    |    |    |    |       |    |    |    |    |    |    |    |    |    |    |  |  |  |
|       | 16 | C             |    |    |    |    |    |    |    |    |    |    |    |       |    |    |    |    |    |    |    |    |    |       |    |    |    |    |    |    |    |    |    |    |  |  |  |
|       |    | H             |    |    |    |    |    |    |    |    |    |    |    |       |    |    |    |    |    |    |    |    |    |       |    |    |    |    |    |    |    |    |    |    |  |  |  |
|       | 17 | C             |    |    |    |    |    |    |    |    |    |    |    |       |    |    |    |    |    |    |    |    |    |       |    |    |    |    |    |    |    |    |    |    |  |  |  |
|       |    | H             |    |    |    |    |    |    |    |    |    |    |    |       |    |    |    |    |    |    |    |    |    |       |    |    |    |    |    |    |    |    |    |    |  |  |  |
|       | 18 | C             |    |    |    |    |    |    |    |    |    |    |    |       |    |    |    |    |    |    |    |    |    |       |    |    |    |    |    |    |    |    |    |    |  |  |  |
|       |    | H             |    |    |    |    |    |    |    |    |    |    |    |       |    |    |    |    |    |    |    |    |    |       |    |    |    |    |    |    |    |    |    |    |  |  |  |
|       | 19 | C             |    |    |    |    |    |    |    |    |    |    |    |       |    |    |    |    |    |    |    |    |    |       |    |    |    |    |    |    |    |    |    |    |  |  |  |
|       |    | H             |    |    |    |    |    |    |    |    |    |    |    |       |    |    |    |    |    |    |    |    |    |       |    |    |    |    |    |    |    |    |    |    |  |  |  |
|       | 20 | C             |    |    |    |    |    |    |    |    |    |    |    |       |    |    |    |    |    |    |    |    |    |       |    |    |    |    |    |    |    |    |    |    |  |  |  |
|       |    | H             |    |    |    |    |    |    |    |    |    |    |    |       |    |    |    |    |    |    |    |    |    |       |    |    |    |    |    |    |    |    |    |    |  |  |  |
|       | 21 | C             |    |    |    |    |    |    |    |    |    |    |    |       |    |    |    |    |    |    |    |    |    |       |    |    |    |    |    |    |    |    |    |    |  |  |  |
|       |    | H             |    |    |    |    |    |    |    |    |    |    |    |       |    |    |    |    |    |    |    |    |    |       |    |    |    |    |    |    |    |    |    |    |  |  |  |
|       | 22 | C             |    |    |    |    |    |    |    |    |    |    |    |       |    |    |    |    |    |    |    |    |    |       |    |    |    |    |    |    |    |    |    |    |  |  |  |
|       |    | H             |    |    |    |    |    |    |    |    |    |    |    |       |    |    |    |    |    |    |    |    |    |       |    |    |    |    |    |    |    |    |    |    |  |  |  |
|       | 23 | C             |    |    |    |    |    |    |    |    |    |    |    |       |    |    |    |    |    |    |    |    |    |       |    |    |    |    |    |    |    |    |    |    |  |  |  |
|       |    | H             |    |    |    |    |    |    |    |    |    |    |    |       |    |    |    |    |    |    |    |    |    |       |    |    |    |    |    |    |    |    |    |    |  |  |  |
|       | 24 | C             |    |    |    |    |    |    |    |    |    |    |    |       |    |    |    |    |    |    |    |    |    |       |    |    |    |    |    |    |    |    |    |    |  |  |  |
|       |    | H             |    |    |    |    |    |    |    |    |    |    |    |       |    |    |    |    |    |    |    |    |    |       |    |    |    |    |    |    |    |    |    |    |  |  |  |
|       | 25 | C             |    |    |    |    |    |    |    |    |    |    |    |       |    |    |    |    |    |    |    |    |    |       |    |    |    |    |    |    |    |    |    |    |  |  |  |
|       | H  |               |    |    |    |    |    |    |    |    |    |    |    |       |    |    |    |    |    |    |    |    |    |       |    |    |    |    |    |    |    |    |    |    |  |  |  |
| 26    | C  |               |    |    |    |    |    |    |    |    |    |    |    |       |    |    |    |    |    |    |    |    |    |       |    |    |    |    |    |    |    |    |    |    |  |  |  |
|       | H  |               |    |    |    |    |    |    |    |    |    |    |    |       |    |    |    |    |    |    |    |    |    |       |    |    |    |    |    |    |    |    |    |    |  |  |  |
| 27    | C  |               |    |    |    |    |    |    |    |    |    |    |    |       |    |    |    |    |    |    |    |    |    |       |    |    |    |    |    |    |    |    |    |    |  |  |  |
|       | H  |               |    |    |    |    |    |    |    |    |    |    |    |       |    |    |    |    |    |    |    | </ |    |       |    |    |    |    |    |    |    |    |    |    |  |  |  |

Supplementary Table S2.

Numbers of agreements and kappa values between PAP smears and FFPE cone samples in the cases of vaccinated and non-vaccinated virus types. n.a.: kappa value is not applicable.

|      | Vaccinated type of HPV |     |     |     |       | Non-vaccinated type of HPV |     |     |     |        |
|------|------------------------|-----|-----|-----|-------|----------------------------|-----|-----|-----|--------|
|      | PAP / FFPE             |     |     |     | Kappa | PAP / FFPE                 |     |     |     | Kappa  |
| case | +/+                    | +/- | -/+ | -/- |       | +/+                        | +/- | -/+ | -/- |        |
| 1    | 1                      | 2   | 0   | 4   | 0.364 | 0                          | 1   | 0   | 25  | n.a.   |
| 2    | 1                      | 2   | 0   | 4   | 0.364 | 0                          | 0   | 0   | 26  | n.a.   |
| 3    | 2                      | 0   | 0   | 5   | 1.000 | 0                          | 0   | 0   | 26  | n.a.   |
| 4    | 0                      | 1   | 0   | 6   | n.a.  | 1                          | 5   | 0   | 20  | 0.235  |
| 5    | 2                      | 0   | 0   | 5   | 1.000 | 1                          | 1   | 1   | 23  | 0.458  |
| 6    | 2                      | 0   | 0   | 5   | 1.000 | 0                          | 3   | 1   | 22  | -0.061 |
| 7    | 1                      | 0   | 0   | 6   | 1.000 | 1                          | 0   | 0   | 25  | 1.000  |
| 8    | 1                      | 2   | 0   | 4   | 0.364 | 0                          | 0   | 0   | 26  | n.a.   |
| 9    | 1                      | 0   | 0   | 6   | 1.000 | 0                          | 1   | 0   | 25  | n.a.   |
| 10   | 3                      | 0   | 0   | 4   | 1.000 | 0                          | 0   | 0   | 26  | n.a.   |
| 11   | 1                      | 0   | 0   | 6   | 1.000 | 0                          | 0   | 0   | 26  | n.a.   |
| 12   | 1                      | 0   | 0   | 6   | 1.000 | 1                          | 0   | 0   | 25  | 1.000  |
| 13   | 0                      | 1   | 0   | 6   | n.a.  | 2                          | 0   | 0   | 24  | 1.000  |
| 14   | 0                      | 3   | 0   | 4   | n.a.  | 3                          | 3   | 0   | 20  | 0.606  |
| 15   | 1                      | 1   | 0   | 5   | 0.588 | 2                          | 1   | 0   | 23  | 0.780  |
| 16   | 1                      | 0   | 0   | 6   | 1.000 | 0                          | 0   | 0   | 26  | n.a.   |
| 17   | 1                      | 0   | 1   | 5   | 0.588 | 0                          | 1   | 0   | 25  | n.a.   |
| 18   | 1                      | 0   | 0   | 6   | 1.000 | 0                          | 0   | 0   | 26  | n.a.   |
| 19   | 1                      | 0   | 0   | 6   | 1.000 | 1                          | 1   | 0   | 24  | 0.649  |
| 20   | 1                      | 1   | 0   | 5   | 0.588 | 0                          | 1   | 0   | 25  | n.a.   |
| 21   | 1                      | 0   | 0   | 6   | 1.000 | 0                          | 3   | 0   | 23  | n.a.   |
| 22   | 1                      | 0   | 0   | 6   | 1.000 | 0                          | 0   | 0   | 26  | n.a.   |
| 23   | 0                      | 0   | 0   | 7   | n.a.  | 2                          | 0   | 0   | 24  | 1.000  |
| 24   | 1                      | 0   | 0   | 6   | 1.000 | 1                          | 0   | 0   | 25  | 1.000  |
| 25   | 1                      | 1   | 0   | 5   | 0.588 | 0                          | 1   | 0   | 25  | n.a.   |
| 26   | 1                      | 1   | 0   | 5   | 0.588 | 0                          | 3   | 0   | 23  | n.a.   |
| 27   | 1                      | 1   | 0   | 5   | 0.588 | 0                          | 1   | 0   | 25  | n.a.   |
| 28   | 1                      | 1   | 0   | 5   | 0.588 | 0                          | 1   | 0   | 25  | n.a.   |
| 29   | 1                      | 0   | 0   | 6   | 1.000 | 1                          | 0   | 0   | 25  | 1.000  |
| 30   | 1                      | 1   | 0   | 5   | 0.588 | 0                          | 1   | 0   | 25  | n.a.   |
| 31   | 0                      | 3   | 0   | 4   | n.a.  | 0                          | 0   | 1   | 25  | n.a.   |
| 32   | 1                      | 1   | 1   | 4   | 0.300 | 0                          | 0   | 0   | 26  | n.a.   |
| 33   | 1                      | 0   | 0   | 6   | 1.000 | 3                          | 0   | 0   | 23  | 1.000  |
| 34   | 0                      | 0   | 0   | 7   | n.a.  | 2                          | 1   | 0   | 23  | 0.780  |

|    |   |   |   |   |       |   |   |   |    |       |
|----|---|---|---|---|-------|---|---|---|----|-------|
| 35 | 1 | 1 | 0 | 5 | 0.588 | 0 | 3 | 0 | 23 | n.a.  |
| 36 | 1 | 1 | 0 | 5 | 0.588 | 0 | 3 | 0 | 23 | n.a.  |
| 37 | 1 | 0 | 0 | 6 | 1.000 | 0 | 2 | 0 | 24 | n.a.  |
| 38 | 1 | 1 | 0 | 5 | 0.588 | 0 | 1 | 0 | 25 | n.a.  |
| 39 | 1 | 1 | 0 | 5 | 0.588 | 0 | 1 | 0 | 25 | n.a.  |
| 40 | 1 | 1 | 0 | 5 | 0.588 | 0 | 2 | 0 | 24 | n.a.  |
| 41 | 1 | 1 | 0 | 5 | 0.588 | 0 | 1 | 0 | 25 | n.a.  |
| 42 | 1 | 1 | 0 | 5 | 0.588 | 0 | 0 | 0 | 26 | n.a.  |
| 43 | 1 | 1 | 0 | 5 | 0.588 | 0 | 0 | 0 | 26 | n.a.  |
| 44 | 0 | 0 | 0 | 7 | n.a.  | 1 | 1 | 0 | 24 | 0.649 |
| 45 | 1 | 0 | 0 | 6 | 1.000 | 0 | 0 | 0 | 26 | n.a.  |
| 46 | 1 | 1 | 0 | 5 | 0.588 | 0 | 0 | 0 | 26 | n.a.  |
| 47 | 0 | 0 | 0 | 7 | n.a.  | 3 | 0 | 0 | 23 | 1.000 |
| 48 | 2 | 1 | 0 | 4 | 0.696 | 0 | 1 | 0 | 25 | n.a.  |
| 49 | 1 | 0 | 0 | 6 | 1.000 | 0 | 0 | 0 | 26 | n.a.  |
